# Supplementary material
Source: PubMed Central journal article supplement (PMC6242297)
Supplement: NIHMS1510484-supplement-1.pdf [file NIHMS1510484-supplement-1.pdf]

**Supplemental Table 1. *PON1* CpG Sites in Illumina 450K and EPIC arrays**

| CpG Site Number | Illumina ID  | Illumina 450K | Illumina EPIC | Coordinates* | Relation to CpG Island |
|-----------------|--------------|---------------|---------------|--------------|------------------------|
| 1               | cg22798737   | yes           | yes           | 94927713     | Open Sea               |
| 2               | cg01879893   | yes           | yes           | 94928192     | Open Sea               |
| 3               | cg09416203   | yes           | yes           | 94928249     | Open Sea               |
| 4               | cg22414405   |               | yes           | 94931749     | Open Sea               |
| 5               | cg01637563   |               | yes           | 94932920     | Open Sea               |
| 6               | cg05495628   |               | yes           | 94938373     | Open Sea               |
| —               | cg05433222** | yes           | yes           | 94948020     | Open Sea               |
| 7               | cg24062571   | yes           | yes           | 94950657     | North Shelf            |
| 8               | cg07404485   | yes           | yes           | 94953653     | North Shore            |
| 9               | cg05342682   | yes           | yes           | 94953680     | North Shore            |
| 10              | cg04155289   | yes           |               | 94953771     | Island                 |
| 11              | cg19678392   | yes           | yes           | 94953810     | Island                 |
| —               | cg01497363** |               | yes           | 94953947     | Island                 |
| 12              | cg21856205   | yes           |               | 94953878     | Island                 |
| 13              | cg17330251   | yes           | yes           | 94953956     | Island                 |
| 14              | cg01874867   | yes           | yes           | 94954059     | South Shore            |
| 15              | cg20119798   | yes           | yes           | 94954144     | South Shore            |
| 16              | cg04871131   | yes           | yes           | 94954202     | South Shore            |
| 17              | cg23055772   | yes           | yes           | 94954438     | South Shore            |
| 18              | cg07809369   | yes           |               | 94954455     | South Shore            |
| —               | cg17020263** | yes           | yes           | 94955053     | South Shore            |
| 19              | cg15887283   | yes           | yes           | 94955348     | South Shore            |

\*hg19

\*\* These CpG sites contained SNPs so their methylation data was not included.

**Supplemental Table 2. Urinary dialkyl phosphate (DAP) concentrations (nmol/L) in CHAMACOS mothers averaged over pregnancy**

|                                | N   | min  | max    | p25  | p50   | p75   | p90   |
|--------------------------------|-----|------|--------|------|-------|-------|-------|
| <b>Maternal mean pregnancy</b> |     |      |        |      |       |       |       |
| Total DAPs                     | 245 | 11.1 | 1936.4 | 61.8 | 124.6 | 272.8 | 495.1 |
| Dimethyl phosphates            | 245 | 3.9  | 1729.0 | 42.8 | 90.6  | 195.2 | 383.9 |
| Diethyl phosphates             | 245 | 1.7  | 395.0  | 9.0  | 20.3  | 46.0  | 90.8  |

**Supplemental Table 3. AREase Activity (U/mL) in CHAMACOS mothers and children by *PON1*<sub>-108</sub> Genotype**

| <i>PON1</i> <sub>-108</sub> Genotype | Maternal 26 wk AREase (U/mL) |             | Child Cord AREase (U/mL) |            | Child 7 year AREase (U/mL) |             |
|--------------------------------------|------------------------------|-------------|--------------------------|------------|----------------------------|-------------|
|                                      | Frequency                    | Mean (SD)   | Frequency                | Mean (SD)  | Frequency                  | Mean (SD)   |
| CC                                   | 36                           | 140.6(33.6) | 69                       | 42.8(13.4) | 62                         | 137.8(30.4) |
| CT                                   | 63                           | 125.3(28.9) | 107                      | 32.0(12.1) | 109                        | 121.5(27.6) |
| TT                                   | 33                           | 111.8(32.5) | 37                       | 28.1(26.3) | 38                         | 103.5(26.3) |
| All                                  | 132                          | 126.1(32.6) | 213                      | 34.8(16.8) | 209                        | 123.1(30.4) |

**\*Maternal AREase activity is displayed over maternal *PON1*<sub>-108</sub> genotype. Child cord and 7 year AREase activity is shown over child *PON1*<sub>-108</sub> genotype.**

**Supplemental Table 4. Regression models of cord blood *PON1* DNA methylation and cognition in boys**

| CpG Site Number | Verbal Comprehension<br>n=110 |             | Perceptual Reasoning<br>n=110 |         | Working Memory<br>n=102 |         | Processing Speed<br>n=101 |         | Full-Scale IQ<br>n=101   |             |
|-----------------|-------------------------------|-------------|-------------------------------|---------|-------------------------|---------|---------------------------|---------|--------------------------|-------------|
|                 | $\beta$ (95%CI)               | p-value     | $\beta$ (95%CI)               | p-value | $\beta$ (95%CI)         | p-value | $\beta$ (95%CI)           | p-value | $\beta$ (95%CI)          | p-value     |
| 1               | 7.67(-6.89,22.24)             | 0.30        | -1.34(-14.80,12.12)           | 0.84    | 2.85(-8.96,14.67)       | 0.63    | 3.31(-9.72,16.34)         | 0.61    | 4.49(-9.06,18.04)        | 0.51        |
| 2               | <b>15.25(2.13,28.37)</b>      | <b>0.02</b> | 5.04(-7.25,17.32)             | 0.42    | -1.26(-11.48,8.95)      | 0.81    | 1.18(-10.69,13.05)        | 0.84    | 7.61(-4.59,19.82)        | 0.22        |
| 3               | 10.49(-2.15,23.14)            | 0.10        | 5.92(-5.80,17.65)             | 0.32    | 8.40(-1.22,18.02)       | 0.09    | 0.61(-10.18,11.41)        | 0.91    | 10.02(-1.01,21.05)       | 0.07        |
| 7               | 8.71(-5.34,22.76)             | 0.22        | -0.53(-13.54,12.48)           | 0.94    | 0.54(-11.31,12.40)      | 0.93    | 3.35(-9.71,16.41)         | 0.61    | 6.96(-6.60,20.52)        | 0.31        |
| 8               | -4.17(-12.94,4.60)            | 0.35        | -0.43(-8.53,7.67)             | 0.92    | 1.77(-5.04,8.57)        | 0.61    | -2.50(-10.00,5.00)        | 0.51    | -1.02(-8.85,6.81)        | 0.80        |
| 9               | -4.97(-13.46,3.52)            | 0.25        | 0.75(-7.10,8.61)              | 0.85    | 1.34(-5.22,7.89)        | 0.69    | -1.73(-8.96,5.50)         | 0.64    | -0.69(-8.23,6.85)        | 0.86        |
| 10              | -4.96(-12.69,2.78)            | 0.21        | 0.31(-6.92,7.54)              | 0.93    | 0.75(-5.30,6.80)        | 0.81    | -1.31(-7.94,5.31)         | 0.69    | -1.05(-7.90,5.80)        | 0.76        |
| 11              | -1.59(-7.00,3.83)             | 0.56        | 1.22(-3.83,6.26)              | 0.63    | 0.90(-3.38,5.17)        | 0.68    | -1.47(-6.15,3.20)         | 0.53    | 0.49(-4.37,5.34)         | 0.84        |
| 12              | -8.55(-20.76,3.67)            | 0.17        | 1.60(-9.74,12.93)             | 0.78    | 2.31(-7.24,11.85)       | 0.63    | -3.57(-14.09,6.94)        | 0.50    | -1.77(-12.75,9.20)       | 0.75        |
| 13              | -3.21(-8.22,1.81)             | 0.21        | 0.01(-4.64,4.66)              | 1.00    | 1.12(-2.75,4.99)        | 0.57    | -1.69(-5.95,2.57)         | 0.43    | -0.87(-5.32,3.58)        | 0.70        |
| 14              | -3.12(-8.54,2.31)             | 0.26        | -0.65(-5.66,4.37)             | 0.80    | 0.88(-3.32,5.08)        | 0.68    | -2.39(-7.00,2.21)         | 0.30    | -1.24(-6.06,3.58)        | 0.61        |
| 15              | -3.07(-10.54,4.39)            | 0.42        | 0.04(-6.85,6.92)              | 0.99    | 1.26(-4.46,6.99)        | 0.66    | -1.76(-8.08,4.56)         | 0.58    | -0.51(-7.09,6.08)        | 0.88        |
| 16              | -3.80(-12.02,4.42)            | 0.36        | 0.16(-7.43,7.74)              | 0.97    | 2.02(-4.39,8.44)        | 0.53    | -2.02(-9.10,5.06)         | 0.57    | 0.13(-7.25,7.51)         | 0.97        |
| 17              | -0.64(-16.12,14.84)           | 0.93        | -0.68(-14.91,13.55)           | 0.92    | 0.65(-12.55,13.86)      | 0.92    | 5.14(-9.39,19.67)         | 0.48    | 4.08(-11.14,19.30)       | 0.60        |
| 18              | -2.12(-13.52,9.27)            | 0.71        | -2.15(-12.62,8.32)            | 0.68    | -0.11(-9.21,8.99)       | 0.98    | -1.32(-11.35,8.72)        | 0.80    | -0.28(-10.73,10.17)      | 0.96        |
| 19              | <b>11.26(0.02,22.51)</b>      | <b>0.05</b> | 6.81(-3.64,17.27)             | 0.20    | 8.20(-1.12,17.53)       | 0.08    | 2.79(-7.66,13.23)         | 0.60    | <b>11.46(0.82,22.09)</b> | <b>0.04</b> |

All models adjusted for maternal education, maternal scores for verbal cognition, cell composition, and batch.

Crude p-values <0.05 are bolded.

None of the associations remained significant after controlling for FDR.

\*Methylation in cord blood samples were assessed by 450K BeadChip. CpG sites 4, 5, and 6 are not shown because they were not assessed by 450K.

**Supplemental Table 5. Regression models of cord blood *PON1* DNA methylation and cognition in girls**

| CpG Site Number | Verbal Comprehension<br>n=120 |             | Perceptual Reasoning<br>n=122 |         | Working Memory<br>n=111    |             | Processing Speed<br>n=113 |         | Full-Scale IQ<br>n=110     |             |
|-----------------|-------------------------------|-------------|-------------------------------|---------|----------------------------|-------------|---------------------------|---------|----------------------------|-------------|
|                 | $\beta$ (95%CI)               | p-value     | $\beta$ (95%CI)               | p-value | $\beta$ (95%CI)            | p-value     | $\beta$ (95%CI)           | p-value | $\beta$ (95%CI)            | p-value     |
| 1               | 5.66(-7.38,18.70)             | 0.39        | 4.02(-6.54,14.57)             | 0.45    | 8.44(-1.56,18.44)          | 0.10        | -0.04(-7.97,7.88)         | 0.99    | 6.73(-3.85,17.31)          | 0.21        |
| 2               | -7.30(-19.40,4.80)            | 0.23        | -4.03(-13.86,5.80)            | 0.42    | -8.46(-17.73,0.80)         | 0.07        | -3.96(-11.25,3.33)        | 0.28    | -7.26(-17.02,2.50)         | 0.14        |
| 3               | -3.94(-16.85,8.98)            | 0.55        | 0.76(-9.64,11.16)             | 0.89    | 0.23(-9.72,10.17)          | 0.96        | -1.52(-9.28,6.24)         | 0.70    | -2.67(-13.18,7.85)         | 0.62        |
| 7               | 7.11(-7.86,22.09)             | 0.35        | 3.21(-8.90,15.32)             | 0.60    | -1.12(-12.74,10.50)        | 0.85        | -4.30(-13.39,4.78)        | 0.35    | 3.09(-9.24,15.41)          | 0.62        |
| 8               | -5.16(-13.90,3.58)            | 0.24        | -3.16(-10.32,4.01)            | 0.38    | -3.01(-9.77,3.75)          | 0.38        | -0.99(-6.17,4.18)         | 0.70    | -4.63(-11.63,2.36)         | 0.19        |
| 9               | -2.74(-10.64,5.16)            | 0.49        | -1.18(-7.58,5.22)             | 0.72    | -1.97(-8.19,4.24)          | 0.53        | -0.50(-5.14,4.13)         | 0.83    | -2.49(-8.94,3.97)          | 0.45        |
| 10              | -4.92(-11.91,2.08)            | 0.17        | -4.22(-9.93,1.50)             | 0.15    | <b>-5.85(-11.20,-0.49)</b> | <b>0.03</b> | -0.68(-5.05,3.69)         | 0.76    | <b>-5.56(-11.12,-0.01)</b> | <b>0.05</b> |
| 11              | -2.17(-7.44,3.10)             | 0.42        | -3.11(-7.35,1.12)             | 0.15    | -2.08(-6.15,2.00)          | 0.31        | -0.17(-3.27,2.94)         | 0.91    | -3.15(-7.37,1.08)          | 0.14        |
| 12              | -3.71(-15.48,8.05)            | 0.53        | -6.19(-15.65,3.27)            | 0.20    | -4.48(-13.69,4.74)         | 0.34        | -1.96(-8.97,5.06)         | 0.58    | -7.38(-16.93,2.18)         | 0.13        |
| 13              | -1.06(-5.89,3.77)             | 0.67        | -1.77(-5.67,2.13)             | 0.37    | -1.93(-5.67,1.82)          | 0.31        | -0.02(-2.85,2.81)         | 0.99    | -2.02(-5.91,1.88)          | 0.31        |
| 14              | -1.71(-6.63,3.21)             | 0.49        | -2.08(-6.06,1.89)             | 0.30    | -2.40(-6.19,1.39)          | 0.21        | 0.53(-2.50,3.56)          | 0.73    | -2.35(-6.28,1.58)          | 0.24        |
| 15              | -2.30(-9.33,4.74)             | 0.52        | -0.59(-6.33,5.14)             | 0.84    | -1.16(-6.64,4.31)          | 0.67        | -1.13(-5.41,3.16)         | 0.60    | -2.15(-7.81,3.50)          | 0.45        |
| 16              | -4.83(-12.56,2.90)            | 0.22        | -3.81(-10.07,2.46)            | 0.23    | -2.97(-9.00,3.07)          | 0.33        | 2.62(-2.14,7.38)          | 0.28    | -3.78(-10.01,2.45)         | 0.23        |
| 17              | <b>-15.68(-31.00,-0.36)</b>   | <b>0.04</b> | -0.21(-12.84,12.43)           | 0.97    | -5.57(-17.76,6.62)         | 0.37        | -7.66(-17.04,1.73)        | 0.11    | -10.37(-23.00,2.26)        | 0.11        |
| 18              | -7.22(-19.38,4.93)            | 0.24        | -2.86(-12.74,7.01)            | 0.57    | -2.54(-11.94,6.85)         | 0.59        | -0.79(-8.36,6.79)         | 0.84    | -4.65(-14.31,5.02)         | 0.34        |
| 19              | 8.33(-3.44,20.10)             | 0.16        | 0.32(-9.20,9.84)              | 0.95    | 6.75(-2.41,15.91)          | 0.15        | 2.72(-4.36,9.80)          | 0.45    | 5.90(-3.68,15.48)          | 0.22        |

All models adjusted for maternal education, maternal scores for verbal cognition, cell composition, and batch.

Crude p-values <0.05 are bolded.

None of the associations remained significant after controlling for FDR.

\*Methylation in cord blood samples were assessed by 450K BeadChip. CpG sites 4, 5, and 6 are not shown because they were not assessed by 450K.

**Supplemental Table 6. Regression models of cord blood PON1 methylation and cognition with adjustment for *PON1*<sub>-108</sub> genotype**

| CpG Site Number | Verbal Comprehension<br>n=231 |         | Perceptual Reasoning<br>n=232 |         | Working Memory<br>n=213   |             | Processing Speed<br>n=214 |         | Full-Scale IQ<br>n=211 |         |
|-----------------|-------------------------------|---------|-------------------------------|---------|---------------------------|-------------|---------------------------|---------|------------------------|---------|
|                 | $\beta$ (95%CI)               | p-value | $\beta$ (95%CI)               | p-value | $\beta$ (95%CI)           | p-value     | $\beta$ (95%CI)           | p-value | $\beta$ (95%CI)        | p-value |
| 1               | 3.36(-5.95,12.70)             | 0.48    | 1.12(-7.19,9.43)              | 0.79    | 4.31(-2.99,11.60)         | 0.25        | -1.40(-8.50,5.71)         | 0.70    | 0.25(3.70,209.00)      | 0.11    |
| 2               | 0.86(-7.76,9.47)              | 0.85    | -0.94(-8.61,6.72)             | 0.81    | -4.52(-11.10,2.09)        | 0.18        | -1.95(-8.50,4.60)         | 0.56    | -1.97(-9.38,5.44)      | 0.60    |
| 3               | 0.66(-8.07,9.38)              | 0.88    | 2.41(-5.35,10.17)             | 0.54    | 3.72(-3.02,10.50)         | 0.28        | -1.55(-8.10,5.00)         | 0.64    | 1.86(-5.57,9.29)       | 0.62    |
| 7               | 5.01(-4.87,14.90)             | 0.32    | 0.13(-8.68,8.95)              | 0.98    | -1.24(-9.09,6.62)         | 0.76        | -0.01(-7.68,7.67)         | 1.00    | 3.15(-5.54,11.80)      | 0.48    |
| 8               | -1.12(-8.47,6.23)             | 0.76    | -1.23(-7.80,5.35)             | 0.71    | -2.59(-8.36,3.18)         | 0.38        | -0.65(-6.19,4.88)         | 0.82    | -2.15(-8.48,4.17)      | 0.50    |
| 9               | 0.03(-6.92,6.97)              | 0.99    | 0.69(-5.50,6.88)              | 0.83    | -2.52(-8.04,3.00)         | 0.37        | 0.16(-5.04,5.37)          | 0.95    | -0.55(-6.61,5.50)      | 0.86    |
| 10              | -2.80(-8.62,3.01)             | 0.34    | -2.61(-7.85,2.63)             | 0.33    | <b>-5.14(-9.70,-0.57)</b> | <b>0.03</b> | 0.32(-4.18,4.83)          | 0.89    | -3.67(-8.68,1.35)      | 0.15    |
| 11              | 0.66(-4.04,5.36)              | 0.78    | -1.35(-5.56,2.86)             | 0.53    | -2.27(-6.05,1.50)         | 0.24        | -0.13(-3.72,3.47)         | 0.94    | -1.20(-5.34,2.93)      | 0.57    |
| 12              | -0.91(-11.10,9.30)            | 0.86    | -2.28(-11.4,6.83)             | 0.62    | -4.73(-13.10,3.63)        | 0.27        | -1.29(-9.25,6.67)         | 0.75    | -4.46(-13.60,4.69)     | 0.34    |
| 13              | 0.28(-4.00,4.56)              | 0.90    | -0.95(-4.77,2.86)             | 0.62    | -1.77(-5.19,1.66)         | 0.31        | 0.12(-3.13,3.36)          | 0.94    | -1.06(-4.82,2.69)      | 0.58    |
| 14              | -0.15(-4.53,4.23)             | 0.95    | -1.74(-5.64,2.17)             | 0.38    | -2.41(-5.89,1.06)         | 0.17        | 0.39(-3.01,3.80)          | 0.82    | -1.65(-5.46,2.16)      | 0.39    |
| 15              | 0.86(-5.21,6.93)              | 0.78    | 0.49(-4.95,5.94)              | 0.86    | -1.20(-6.01,3.60)         | 0.62        | -0.28(-4.93,4.38)         | 0.91    | -0.26(-5.51,4.99)      | 0.92    |
| 16              | -1.77(-7.90,4.36)             | 0.57    | -1.59(-7.06,3.87)             | 0.57    | -1.61(-6.41,3.19)         | 0.51        | 1.84(-2.85,6.52)          | 0.44    | -1.06(-6.32,4.19)      | 0.69    |
| 17              | -8.90(-19.20,1.40)            | 0.09    | -0.61(-9.86,8.64)             | 0.90    | -3.78(-12.20,4.62)        | 0.38        | -0.39(-8.53,7.74)         | 0.92    | -4.43(-13.60,4.76)     | 0.34    |
| 18              | -2.85(-11.30,5.60)            | 0.51    | -2.43(-9.96,5.11)             | 0.53    | -2.66(-9.27,3.94)         | 0.43        | -0.43(-6.96,6.09)         | 0.90    | -2.15(-9.37,5.06)      | 0.56    |
| 19              | 6.25(-1.53,14.00)             | 0.12    | 3.31(-3.62,10.20)             | 0.35    | 5.69(-0.45,11.80)         | 0.07        | 1.88(-4.09,7.84)          | 0.54    | 5.97(-0.76,12.70)      | 0.08    |

All models adjusted for maternal education, maternal scores for verbal cognition, cell composition, batch, and *PON1*<sub>-108</sub> genotype.

Crude p-values <0.05 are bolded.

None of the associations remained significant after controlling for FDR.

\*Methylation in cord blood samples were assessed by 450K BeadChip. CpG sites 4, 5, and 6 are not shown because they were not assessed by 450K.

| CpG Site Number |             | vciq n=67/61                |                     | priq n=67/61                |                     | wmiq n=64/58             |                     | psiq n=64/58                |                     | fsiq n=62/58                |                     |
|-----------------|-------------|-----------------------------|---------------------|-----------------------------|---------------------|--------------------------|---------------------|-----------------------------|---------------------|-----------------------------|---------------------|
|                 |             | $\beta$ (95%CI)             | interaction p-value | $\beta$ (95%CI)             | interaction p-value | $\beta$ (95%CI)          | interaction p-value | $\beta$ (95%CI)             | interaction p-value | $\beta$ (95%CI)             | interaction p-value |
| 1               | low AREase  | 3.84(-13.88,21.56)          | 0.75                | 8.69(-6.46,23.84)           | 0.45                | 9.89(-1.17,20.94)        | 0.20                | 8.92(-5.4,23.24)            | 0.56                | 11.65(-3.26,26.55)          | 0.82                |
|                 | high AREase | -1.65(-17.85,14.54)         |                     | -8.7(-26.54,9.15)           |                     | -0.13(-15.85,15.59)      |                     | -11.51(-25.79,2.77)         |                     | -6.84(-22.11,8.43)          |                     |
| 2               | low AREase  | 0.91(-18.08,19.91)          | 0.53                | 0.88(-15.53,17.29)          | 0.21                | 1.18(-10.62,12.99)       | 0.54                | 5.84(-9.09,20.77)           | 0.64                | 2.82(-12.88,18.52)          | 0.83                |
|                 | high AREase | -9.79(-26.42,6.83)          |                     | -1.66(-20.43,17.1)          |                     | -12.06(-28.18,4.05)      |                     | <b>-15.64(-30.34,-0.93)</b> |                     | -10.46(-26.35,5.42)         |                     |
| 3               | low AREase  | 5.68(-12.16,23.52)          | 0.26                | 13.37(-1.65,28.38)          | 0.95                | <b>14.14(3.57,24.7)</b>  | 0.20                | 8.9(-5.46,23.26)            | 0.23                | <b>14.96(0.37,29.54)</b>    | 0.45                |
|                 | high AREase | -4.84(-20.7,11.01)          |                     | -6.2(-23.81,11.41)          |                     | 5.53(-9.65,20.7)         |                     | <b>-17.97(-31.16,-4.77)</b> |                     | -7.2(-22.01,7.61)           |                     |
| 7               | low AREase  | 16.28(-4.38,36.95)          | 0.27                | <b>24.58(7.63,41.54)</b>    | 0.89                | <b>13.83(1.13,26.54)</b> | 0.84                | 11.33(-5.68,28.33)          | 0.92                | <b>23.67(6.96,40.37)</b>    | 0.59                |
|                 | high AREase | -13.46(-30.92,3.99)         |                     | <b>-21.37(-40.27,-2.48)</b> |                     | -15.53(-33.21,2.15)      |                     | -6.73(-23.72,10.26)         |                     | <b>-17.73(-34.83,-0.62)</b> |                     |
| 8               | low AREase  | -0.99(-14.61,12.63)         | 0.08                | 4.97(-6.94,16.87)           | 0.14                | 3.09(-5.74,11.92)        | 0.09                | -4.55(-15.65,6.54)          | 0.30                | 3.72(-8.17,15.61)           | 0.06                |
|                 | high AREase | <b>-10.28(-19.65,-0.92)</b> |                     | -4.97(-15.82,5.88)          |                     | -4.54(-13.88,4.79)       |                     | 2.91(-5.87,11.69)           |                     | -6.75(-15.77,2.27)          |                     |
| 9               | low AREase  | 0.16(-11.64,11.97)          | 0.06                | 5.14(-4.95,15.24)           | 0.09                | 4.45(-3.56,12.46)        | 0.07                | -1.62(-11.11,7.87)          | 0.42                | 5.31(-5.33,15.95)           | <b>0.04</b>         |
|                 | high AREase | <b>-10.13(-18.78,-1.49)</b> |                     | -4.04(-14.14,6.07)          |                     | -4.36(-13.03,4.31)       |                     | 2.96(-5.19,11.11)           |                     | -6.2(-14.59,2.19)           |                     |
| 10              | low AREase  | -1.13(-13.02,10.75)         | 0.11                | 4.44(-6.44,15.31)           | 0.16                | 0.21(-7.87,8.29)         | 0.09                | -1.2(-11.66,9.25)           | 0.87                | 3.31(-7.3,13.92)            | <b>0.03</b>         |
|                 | high AREase | -6.47(-14.61,1.67)          |                     | -5.55(-14.71,3.6)           |                     | -6.05(-13.97,1.86)       |                     | 2.59(-4.96,10.15)           |                     | -5.53(-13.32,2.26)          |                     |
| 11              | low AREase  | 0.83(-7.1,8.77)             | 0.10                | 1.05(-6.16,8.27)            | 0.11                | 2.6(-3.03,8.22)          | <b>0.03</b>         | -1.19(-7.94,5.56)           | 0.33                | 3.29(-4.08,10.66)           | <b>0.03</b>         |
|                 | high AREase | -3.8(-10.11,2.51)           |                     | -1.03(-8.14,6.09)           |                     | -1.75(-8.4,4.49)         |                     | 3.82(-1.92,9.57)            |                     | -1.89(-8.01,4.23)           |                     |
| 12              | low AREase  | -5.88(-22.84,11.07)         | 0.27                | 0.91(-13.81,15.63)          | 0.13                | 1.88(-9.62,13.39)        | 0.09                | -4.34(-18.07,9.39)          | 0.25                | 0.51(-14.73,15.76)          | 0.09                |
|                 | high AREase | -9.77(-23.03,3.5)           |                     | -2.11(-17.19,12.98)         |                     | -1.77(-15.35,11.81)      |                     | 7.55(-4.95,20.05)           |                     | -4.9(-18.14,8.34)           |                     |
| 13              | low AREase  | -0.78(-8.07,6.5)            | 0.14                | 1.01(-5.28,7.3)             | 0.28                | 2.05(-2.97,7.07)         | 0.09                | -0.94(-6.86,4.98)           | 0.35                | 1.76(-4.94,8.46)            | 0.11                |
|                 | high AREase | -4.26(-10.07,1.55)          |                     | -2.49(-9.06,4.08)           |                     | -2.41(-8.14,3.31)        |                     | 3.18(-2.13,8.49)            |                     | -2.8(-8.39,2.79)            |                     |
| 14              | low AREase  | -1.01(-8.65,6.62)           | 0.12                | 0.21(-6.48,6.89)            | 0.24                | 1.27(-3.94,6.47)         | 0.10                | -0.17(-6.69,6.35)           | 0.54                | 1.53(-5.28,8.34)            | 0.07                |
|                 | high AREase | -5.11(-10.91,0.7)           |                     | -3.41(-10.01,3.19)          |                     | -2.93(-8.66,2.8)         |                     | 2.24(-3.14,7.63)            |                     | -3.83(-9.4,1.73)            |                     |
| 15              | low AREase  | 1.75(-8.53,12.02)           | 0.07                | 5.01(-3.88,13.9)            | 0.14                | 5.22(-1.63,12.07)        | <b>0.04</b>         | -2.85(-11.44,5.74)          | 0.25                | 5.03(-4.01,14.08)           | 0.06                |
|                 | high AREase | <b>-7.94(-15.81,-0.07)</b>  |                     | -3.76(-12.82,5.3)           |                     | -4.26(-12.04,3.52)       |                     | 2.51(-4.82,9.84)            |                     | -5.32(-12.88,2.24)          |                     |
| 16              | low AREase  | 1.07(-10.07,12.21)          | <b>0.05</b>         | 3.4(-6.3,13.1)              | 0.23                | 3(-4.39,10.38)           | 0.07                | 1.8(-7.58,11.17)            | 1.00                | 4.29(-5.42,13.99)           | <b>0.04</b>         |
|                 | high AREase | <b>-12.04(-20.55,-3.53)</b> |                     | -5.43(-15.55,4.69)          |                     | -5.38(-14.09,3.33)       |                     | 1.68(-6.59,9.95)            |                     | -7.6(-15.97,0.78)           |                     |
| 17              | low AREase  | -5.17(-28.25,17.9)          | 0.60                | 6.81(-13.08,26.69)          | 0.57                | 8.82(-6.07,23.72)        | 0.84                | 1.97(-17.45,21.4)           | 0.46                | 7.04(-13.23,27.31)          | 0.27                |
|                 | high AREase | <b>-18.28(-34.16,-2.4)</b>  |                     | <b>-20.82(-38.43,-3.2)</b>  |                     | -11.87(-28.72,4.98)      |                     | -12.03(-27.73,3.66)         |                     | <b>-20.63(-36.32,-4.95)</b> |                     |
| 18              | low AREase  | 2.27(-16.38,20.91)          | <b>0.05</b>         | 11.68(-4.32,27.67)          | 0.44                | 8.95(-2.74,20.63)        | 0.40                | -4.94(-20.57,10.7)          | 0.25                | 8.11(-7.36,23.59)           | 0.18                |
|                 | high AREase | -8.58(-20.75,3.59)          |                     | -7.79(-21.22,5.64)          |                     | -3.11(-15.63,9.41)       |                     | 2.94(-8.77,14.65)           |                     | -5.72(-17.72,6.28)          |                     |
| 19              | low AREase  | 6.75(-10.95,24.45)          | 0.39                | <b>16.22(1.52,30.92)</b>    | 0.80                | <b>12.42(1.91,22.93)</b> | 0.27                | 8.32(-5.61,22.26)           | 0.54                | 13.9(-0.32,28.11)           | 0.60                |
|                 | high AREase | -1.77(-16.7,13.16)          |                     | -8.11(-24.56,8.35)          |                     | 2.68(-11.91,17.27)       |                     | -5.39(-18.95,8.17)          |                     | -3.89(-18.16,10.38)         |                     |

**Supplemental Table 7. Regression of Cord DNA Methylation stratified by maternal AREase activity**

All models adjusted for maternal education, maternal scores for verbal cognition, cell composition, and batch.

The  $\beta$ (95%CI) shown are for models stratified by low and high maternal AREase activity while the interaction p-value is based on the interaction term of maternal AREase activity X PON1 DNA methylation at each CpG site.

$\beta$ (95%CI) with corresponding unadjusted p-values <0.05 and unadjusted interaction p-values <0.05 are bolded.

None of the associations remained significant after controlling for FDR.

Methylation in cord blood samples were assessed by 450K BeadChip. CpG sites 4,5, and 6 are not shown because they were not assessed by 450K.

The N's given are for low and high maternal AREase groups.

| CpG Site Number |       | vc1q n=71/153               |                     | priq n=72/153               |                     | wmiq n=67/138       |                     | psiq n=68/138       |                     | fsiq n=67/137               |                     |
|-----------------|-------|-----------------------------|---------------------|-----------------------------|---------------------|---------------------|---------------------|---------------------|---------------------|-----------------------------|---------------------|
|                 |       | $\beta$ (95%CI)             | interaction p-value | $\beta$ (95%CI)             | interaction p-value | $\beta$ (95%CI)     | interaction p-value | $\beta$ (95%CI)     | interaction p-value | $\beta$ (95%CI)             | interaction p-value |
| 1               | CC    | -5.31(-22.1,11.48)          | 0.50                | -4.23(-20.56,12.1)          | 0.66                | 5.45(-7.86,18.77)   | 0.56                | -2.12(-13.17,8.92)  | 0.68                | -2.31(-16.72,12.09)         | 0.86                |
|                 | CT/TT | 7.42(-3.81,18.66)           |                     | 4.14(-5.3,13.58)            |                     | 4.3(-4.7,13.3)      |                     | -1.46(-10.9,7.97)   |                     | 5.39(-4.25,15.03)           |                     |
| 2               | CC    | -7.4(-24.91,10.1)           | 0.89                | -4.28(-21.33,12.77)         | 0.70                | -8.56(-22.38,5.26)  | 0.67                | -7.58(-18.94,3.78)  | 0.91                | -8.71(-23.6,6.18)           | 0.97                |
|                 | CT/TT | 3.22(-7.04,13.48)           |                     | 2.75(-5.8,11.3)             |                     | -1.95(-9.84,5.95)   |                     | -0.37(-8.88,8.14)   |                     | 1.26(-7.43,9.95)            |                     |
| 3               | CC    | -7.28(-21.96,7.39)          | 0.66                | 2.67(-11.52,16.85)          | 0.59                | 3.1(-8.55,14.74)    | 0.51                | 1.12(-8.4,10.64)    | 0.39                | -1.03(-13.59,11.53)         | 0.77                |
|                 | CT/TT | 6.03(-4.85,16.91)           |                     | 1.6(-7.55,10.75)            |                     | 4.25(-4.25,12.75)   |                     | -2.03(-11.01,6.94)  |                     | 4.13(-5.05,13.32)           |                     |
| 7               | CC    | -0.04(-17.04,16.95)         | 0.91                | -10.1(-26.33,6.12)          | 0.49                | -1.89(-15.65,11.87) | 0.54                | 1.44(-9.86,12.74)   | 0.40                | -3.37(-18.16,11.41)         | 0.99                |
|                 | CT/TT | 7.16(-5.4,19.72)            |                     | 5.48(-5.05,16.01)           |                     | 0.07(-10.04,10.17)  |                     | -2.09(-12.77,8.6)   |                     | 6.64(-4.28,17.56)           |                     |
| 8               | CC    | -8.45(-23.07,6.17)          | 0.06                | -1.35(-15.56,12.86)         | 0.43                | -6.81(-18.7,5.08)   | 0.29                | -5.9(-15.59,3.79)   | 0.30                | -6.43(-19.26,6.4)           | 0.12                |
|                 | CT/TT | -1.12(-8.26,6.02)           |                     | 0.99(-5.01,7)               |                     | 1.15(-4.49,6.79)    |                     | -0.1(-5.89,5.7)     |                     | 0.5(-5.53,6.53)             |                     |
| 9               | CC    | -5.24(-19.8,9.32)           | 0.06                | 0.54(-13.4,14.47)           | 0.40                | -6.53(-18.71,5.65)  | 0.23                | -8(-17.71,1.72)     | 0.13                | -4.14(-17.34,9.06)          | 0.09                |
|                 | CT/TT | -0.49(-7.1,6.11)            |                     | 2.09(-3.43,7.61)            |                     | 1.07(-4.19,6.33)    |                     | 0.91(-4.41,6.23)    |                     | 1.35(-4.25,6.95)            |                     |
| 10              | CC    | -10.99(-22.91,0.93)         | <b>0.03</b>         | -4.46(-16.24,7.33)          | 0.54                | -7.34(-16.99,2.3)   | 0.45                | -5.75(-13.7,2.21)   | 0.15                | -8.84(-19.16,1.49)          | 0.09                |
|                 | CT/TT | -1.9(-7.92,4.12)            |                     | -0.71(-5.85,4.43)           |                     | -1.63(-6.5,3.23)    |                     | 1.15(-3.91,6.22)    |                     | -0.91(-6.04,4.23)           |                     |
| 11              | CC    | -1.68(-11.3,7.94)           | 0.26                | 2.01(-7.3,11.32)            | 0.94                | -2.97(-10.91,4.97)  | 0.19                | -5.66(-12.04,0.72)  | 0.08                | -1.43(-10.01,7.15)          | 0.25                |
|                 | CT/TT | -0.78(-5.07,3.52)           |                     | -0.6(-4.24,3.04)            |                     | 0.23(-3.27,3.74)    |                     | 0.53(-3.02,4.09)    |                     | -0.2(-3.91,3.5)             |                     |
| 12              | CC    | -1.79(-22.34,18.76)         | 0.57                | 4.16(-15.7,24.01)           | 0.92                | -3.36(-20.2,13.49)  | 0.34                | -11.83(-25.31,1.66) | 0.14                | -1.96(-20.1,16.19)          | 0.50                |
|                 | CT/TT | -4.24(-14.5,5.2)            |                     | -0.96(-9.14,7.23)           |                     | -0.22(-8.26,7.83)   |                     | 0.34(-7.87,8.55)    |                     | -2.7(-11.28,5.87)           |                     |
| 13              | CC    | -1.86(-11.08,7.37)          | 0.18                | 1.54(-7.35,10.44)           | 0.80                | -2.83(-10.5,4.84)   | 0.20                | -4.69(-10.86,1.49)  | 0.14                | -1.52(-9.8,6.77)            | 0.20                |
|                 | CT/TT | -0.98(-4.93,2.97)           |                     | -0.14(-3.45,3.18)           |                     | 0.36(-2.82,3.55)    |                     | 0.42(-2.8,3.65)     |                     | -0.2(-3.59,3.19)            |                     |
| 14              | CC    | -3.66(-12.64,5.31)          | 0.10                | -0.38(-9.1,8.34)            | 0.61                | -4.68(-12.12,2.77)  | 0.14                | -5.01(-11.06,1.04)  | 0.13                | -3.57(-11.64,4.5)           | 0.12                |
|                 | CT/TT | -0.71(-4.88,3.46)           |                     | -0.42(-3.92,3.08)           |                     | 0.2(-3.16,3.55)     |                     | 0.84(-2.66,4.35)    |                     | -0.18(-3.73,3.38)           |                     |
| 15              | CC    | -10.3(-23.53,2.94)          | <b>0.01</b>         | 0.29(-12.71,13.28)          | 0.36                | -7.58(-18.71,3.54)  | 0.14                | -6.66(-15.73,2.4)   | 0.20                | -7.18(-19.2,4.84)           | <b>0.03</b>         |
|                 | CT/TT | 1.02(-4.86,6.89)            |                     | 2.11(-2.82,7.03)            |                     | 1.84(-2.81,6.49)    |                     | 0.19(-4.66,5.04)    |                     | 1.95(-2.99,6.89)            |                     |
| 16              | CC    | <b>-16.83(-29.07,-4.58)</b> | <b>1.00E-03</b>     | -6.55(-19.08,5.98)          | 0.24                | -7.95(-18.57,2.68)  | 0.17                | -1.9(-10.84,7.03)   | 0.39                | <b>-11.74(-22.96,-0.52)</b> | <b>0.01</b>         |
|                 | CT/TT | 0.81(-5.66,7.28)            |                     | 1.39(-4.04,6.82)            |                     | 1.96(-3.15,7.07)    |                     | 1.81(-3.52,7.15)    |                     | 2.65(-2.76,8.07)            |                     |
| 17              | CC    | -14.47(-35.3,6.35)          | 0.53                | -10.14(-30.54,10.26)        | 0.99                | -0.94(-17.61,15.73) | 0.27                | -5.59(-19.27,8.08)  | 0.68                | -11(-28.68,6.68)            | 0.85                |
|                 | CT/TT | -5.82(-18.24,6.6)           |                     | 4.5(-5.91,14.9)             |                     | -2.49(-12.8,7.81)   |                     | 2.39(-8.38,13.15)   |                     | 1.28(-9.81,12.36)           |                     |
| 18              | CC    | -14.09(-28.75,0.57)         | 0.15                | <b>-14.75(-28.95,-0.55)</b> | 0.08                | -6.53(-18.5,5.45)   | 0.52                | -6.8(-16.58,2.98)   | 0.55                | <b>-13.94(-26.35,-1.53)</b> | 0.09                |
|                 | CT/TT | -1.01(-11.05,9.04)          |                     | 5.78(-2.59,14.15)           |                     | 2.63(-5.24,10.5)    |                     | 1(-7.37,9.36)       |                     | 4(-4.34,12.33)              |                     |
| 19              | CC    | 7.81(-6.55,22.16)           | 0.44                | 3.25(-10.66,17.17)          | 0.55                | 5.68(-6.28,17.64)   | 0.29                | 0.66(-9.17,10.49)   | 0.30                | 6.89(-5.95,19.73)           | 0.25                |
|                 | CT/TT | 5.47(-4.02,14.96)           |                     | 3.33(-4.64,11.29)           |                     | 4.86(-2.69,12.4)    |                     | 0.57(-7.33,8.47)    |                     | 4.75(-3.31,12.81)           |                     |

**Supplemental Table 8. Regression of Cord DNA Methylation stratified by maternal PON1 -108 Genotype (either CC or CT/TT).**

All models adjusted for maternal education, maternal scores for verbal cognition, cell composition, and batch.

The  $\beta$ (95%CI) shown are for models stratified by PON1 -108 genotype (grouped by CC or CT/TT) while the interaction p-value is based on the interaction term of PON1 -108 genotypes coded as number of T alleles X PON1 DNA methylation at each CpG site.

$\beta$ (95%CI) with corresponding unadjusted p-values <0.05 and unadjusted interaction p-values <0.05 are bolded.

None of the associations remained significant after controlling for FDR.

Methylation in cord blood samples were assessed by 450K BeadChip. CpG sites 4,5, and 6 are not shown because they were not assessed by 450K.

The N's given are for maternal PON1 -108 Genotype CC and for CT and TT grouped together.

**Supplemental Table 9. Regression models of 7-year old blood *PON1* DNA methylation and cognition in boys**

| CpG Site Number | Verbal Comprehension<br>n=86 |             | Perceptual Reasoning<br>n=86 |             | Working Memory<br>n=80 |         | Processing Speed<br>n=80 |         | Full-Scale IQ<br>n=80  |             |
|-----------------|------------------------------|-------------|------------------------------|-------------|------------------------|---------|--------------------------|---------|------------------------|-------------|
|                 | $\beta$ (95%CI)              | p-value     | $\beta$ (95%CI)              | p-value     | $\beta$ (95%CI)        | p-value | $\beta$ (95%CI)          | p-value | $\beta$ (95%CI)        | p-value     |
| 1               | 0.16(-10.55,10.87)           | 0.98        | -6.63(-17.09,3.83)           | 0.21        | 0.83(-7.90,9.57)       | 0.85    | 2.93(-7.17,13.03)        | 0.56    | -1.64(-11.57,8.30)     | 0.74        |
| 2               | 1.57(-3.29,6.43)             | 0.52        | -1.77(-6.56,3.01)            | 0.46        | -1.16(-5.19,2.87)      | 0.57    | -0.21(-4.89,4.47)        | 0.93    | -0.77(-5.36,3.82)      | 0.74        |
| 3               | 1.19(-5.20,7.58)             | 0.71        | 1.51(-4.79,7.81)             | 0.63        | 3.85(-1.48,9.18)       | 0.15    | 2.86(-3.41,9.13)         | 0.37    | 2.11(-4.02,8.24)       | 0.49        |
| 4               | 2.17(-6.68,11.01)            | 0.63        | 0.25(-8.48,8.99)             | 0.95        | -3.09(-10.08,3.90)     | 0.38    | -0.05(-8.20,8.09)        | 0.99    | -0.21(-8.21,7.80)      | 0.96        |
| 5               | 1.74(-2.35,5.82)             | 0.40        | 0.39(-3.68,4.45)             | 0.85        | 1.93(-1.44,5.30)       | 0.26    | 0.06(-3.86,3.98)         | 0.98    | 0.91(-2.95,4.77)       | 0.64        |
| 6               | <b>5.46(0.50,10.42)</b>      | <b>0.03</b> | 4.66(-0.27,9.59)             | 0.06        | 3.48(-0.51,7.48)       | 0.09    | 3.11(-1.56,7.78)         | 0.19    | <b>5.11(0.63,9.59)</b> | <b>0.03</b> |
| 7               | 1.97(-7.11,11.05)            | 0.67        | 2.28(-6.68,11.23)            | 0.61        | -0.61(-7.95,6.73)      | 0.87    | 0.28(-8.07,8.63)         | 0.95    | 0.92(-7.44,9.27)       | 0.83        |
| 8               | -0.17(-6.96,6.62)            | 0.96        | 0.70(-6.00,7.40)             | 0.84        | -2.39(-7.76,2.98)      | 0.38    | -4.37(-10.55,1.80)       | 0.16    | -1.91(-8.05,4.22)      | 0.54        |
| 9               | -3.97(-10.91,2.97)           | 0.26        | 0.38(-6.69,7.45)             | 0.91        | -2.57(-8.23,3.09)      | 0.37    | -3.59(-10.13,2.95)       | 0.28    | -3.41(-9.82,2.99)      | 0.29        |
| 11              | -0.32(-5.50,4.85)            | 0.90        | 0.99(-4.12,6.09)             | 0.70        | -1.55(-5.64,2.53)      | 0.45    | -3.73(-8.40,0.93)        | 0.11    | -1.21(-5.86,3.45)      | 0.61        |
| 13              | 0.29(-3.39,3.98)             | 0.87        | 0.82(-2.81,4.46)             | 0.65        | -1.18(-4.08,1.73)      | 0.42    | -2.30(-5.63,1.04)        | 0.17    | -0.59(-3.91,2.73)      | 0.72        |
| 14              | -0.12(-3.93,3.69)            | 0.95        | 0.40(-3.35,4.16)             | 0.83        | -1.35(-4.36,1.65)      | 0.37    | -2.26(-5.72,1.20)        | 0.20    | -0.92(-4.36,2.51)      | 0.59        |
| 15              | -0.56(-5.64,4.52)            | 0.83        | 0.29(-4.73,5.30)             | 0.91        | -1.41(-5.43,2.61)      | 0.49    | -2.46(-7.10,2.18)        | 0.29    | -1.31(-5.89,3.27)      | 0.57        |
| 16              | 0.18(-3.43,3.79)             | 0.92        | 0.56(-3.01,4.12)             | 0.76        | -1.60(-4.45,1.24)      | 0.26    | -2.15(-5.43,1.13)        | 0.20    | -0.79(-4.05,2.47)      | 0.63        |
| 17              | -3.17(-13.23,6.88)           | 0.53        | <b>-10.52(-20.17,-0.87)</b>  | <b>0.03</b> | -3.03(-11.40,5.33)     | 0.47    | -3.67(-13.35,6.02)       | 0.45    | -7.14(-16.54,2.26)     | 0.13        |
| 19              | -5.20(-12.38,1.99)           | 0.15        | 0.46(-6.73,7.65)             | 0.90        | -0.48(-6.58,5.62)      | 0.88    | 1.37(-5.69,8.43)         | 0.70    | -1.78(-8.71,5.14)      | 0.61        |

All models adjusted for maternal education, maternal scores for verbal cognition, cell composition, and batch.

Crude p-values <0.05 are bolded.

None of the associations remained significant after controlling for FDR.

\*Methylation in 7-year old blood samples were assessed by EPIC BeadChip. CpG sites 10 and 18 are not shown because they were not assessed by EPIC.



**Supplemental Table 10. Regression models of 7-year old blood *PON1* DNA methylation and cognition in girls**

| CpG Site Number | Verbal Comprehension<br>n=103 |         | Perceptual Reasoning<br>n=103 |         | Working Memory<br>n=95 |         | Processing Speed<br>n=95 |             | Full-Scale IQ<br>n=94 |         |
|-----------------|-------------------------------|---------|-------------------------------|---------|------------------------|---------|--------------------------|-------------|-----------------------|---------|
|                 | $\beta$ (95%CI)               | p-value | $\beta$ (95%CI)               | p-value | $\beta$ (95%CI)        | p-value | $\beta$ (95%CI)          | p-value     | $\beta$ (95%CI)       | p-value |
| 1               | 8.60(-2.17,19.37)             | 0.12    | 8.35(-1.11,17.80)             | 0.08    | 3.07(-5.56,11.69)      | 0.48    | <b>8.05(0.94,15.16)</b>  | <b>0.03</b> | 7.94(-1.31,17.18)     | 0.09    |
| 2               | -2.81(-7.49,1.86)             | 0.24    | -1.05(-5.18,3.07)             | 0.61    | -0.89(-4.57,2.80)      | 0.63    | -1.25(-4.33,1.83)        | 0.42        | -2.41(-6.33,1.52)     | 0.23    |
| 3               | 3.21(-2.39,8.81)              | 0.26    | -0.44(-5.42,4.54)             | 0.86    | 0.36(-4.28,4.99)       | 0.88    | 1.91(-1.87,5.68)         | 0.32        | 1.38(-3.56,6.32)      | 0.58    |
| 4               | 3.09(-6.22,12.41)             | 0.51    | 3.58(-4.63,11.79)             | 0.39    | 1.31(-6.03,8.65)       | 0.72    | -1.30(-7.47,4.87)        | 0.68        | 1.95(-5.92,9.81)      | 0.62    |
| 5               | -1.15(-4.81,2.51)             | 0.53    | -1.10(-4.30,2.09)             | 0.49    | -2.31(-5.19,0.57)      | 0.11    | 0.32(-2.07,2.72)         | 0.79        | -1.60(-4.65,1.45)     | 0.30    |
| 6               | -0.40(-5.19,4.40)             | 0.87    | -3.01(-7.20,1.18)             | 0.16    | -1.11(-4.95,2.74)      | 0.57    | 0.31(-2.88,3.50)         | 0.85        | -1.72(-5.79,2.36)     | 0.40    |
| 7               | 4.39(-4.18,12.96)             | 0.31    | 0.88(-6.71,8.47)              | 0.82    | -0.46(-7.39,6.46)      | 0.89    | 0.85(-4.81,6.51)         | 0.76        | 2.03(-5.30,9.35)      | 0.58    |
| 8               | -0.18(-5.83,5.47)             | 0.95    | -2.73(-7.69,2.23)             | 0.28    | -0.34(-4.81,4.14)      | 0.88    | -0.27(-3.94,3.40)        | 0.88        | -1.02(-5.74,3.71)     | 0.67    |
| 9               | 0.55(-5.50,6.60)              | 0.86    | -2.74(-8.05,2.57)             | 0.31    | -0.80(-5.66,4.05)      | 0.74    | -0.72(-4.71,3.27)        | 0.72        | -1.30(-6.43,3.83)     | 0.62    |
| 11              | -1.24(-5.93,3.44)             | 0.60    | -2.55(-6.66,1.56)             | 0.22    | -1.74(-5.47,1.99)      | 0.36    | -0.67(-3.75,2.42)        | 0.67        | -1.87(-5.82,2.08)     | 0.35    |
| 13              | -1.51(-5.04,2.01)             | 0.40    | -1.02(-4.16,2.11)             | 0.52    | -0.59(-3.47,2.28)      | 0.68    | -0.70(-3.04,1.64)        | 0.55        | -1.23(-4.26,1.80)     | 0.42    |
| 14              | -0.67(-4.06,2.72)             | 0.70    | -2.04(-5.01,0.93)             | 0.18    | -0.72(-3.43,1.99)      | 0.60    | -0.50(-2.72,1.73)        | 0.66        | -1.24(-4.10,1.62)     | 0.39    |
| 15              | -0.59(-4.94,3.76)             | 0.79    | -1.68(-5.48,2.12)             | 0.38    | -0.71(-4.23,2.81)      | 0.69    | -0.47(-3.35,2.42)        | 0.75        | -1.12(-4.84,2.60)     | 0.55    |
| 16              | -0.26(-3.30,2.77)             | 0.86    | -1.41(-4.07,1.25)             | 0.30    | -0.72(-3.22,1.78)      | 0.57    | -0.33(-2.38,1.72)        | 0.75        | -0.87(-3.52,1.77)     | 0.51    |
| 17              | 1.34(-6.97,9.66)              | 0.75    | 1.10(-6.23,8.43)              | 0.77    | -1.94(-8.38,4.51)      | 0.55    | -1.47(-6.82,3.88)        | 0.59        | 0.07(-6.83,6.97)      | 0.98    |
| 19              | -3.45(-10.10,3.20)            | 0.31    | -2.32(-8.18,3.55)             | 0.43    | -0.97(-6.27,4.34)      | 0.72    | -1.07(-5.35,3.21)        | 0.62        | -3.49(-9.07,2.10)     | 0.22    |

All models adjusted for maternal education, maternal scores for verbal cognition, cell composition, and batch.

Crude p-values <0.05 are bolded.

None of the associations remained significant after controlling for FDR.

\*Methylation in 7-year old blood samples were assessed by EPIC BeadChip. CpG sites 10 and 18 are not shown because they were not assessed by EPIC.

**Supplemental Table 11. Regression models of 7-year old PON1 methylation and WISC-IV IQ at age 7 years with adjustment for *PON1*<sub>-108</sub> genotype**

| CpG Site Number | Verbal Comprehension<br>n=178 |         | Perceptual Reasoning<br>n=177 |         | Working Memory<br>n=165 |         | Processing Speed<br>n=165 |             | Full-Scale IQ<br>n=164 |         |
|-----------------|-------------------------------|---------|-------------------------------|---------|-------------------------|---------|---------------------------|-------------|------------------------|---------|
|                 | $\beta$ (95%CI)               | p-value | $\beta$ (95%CI)               | p-value | $\beta$ (95%CI)         | p-value | $\beta$ (95%CI)           | p-value     | $\beta$ (95%CI)        | p-value |
| 1               | 6.84(-0.99,14.70)             | 0.09    | 2.68(-4.52,9.87)              | 0.46    | 1.74(-4.38,7.85)        | 0.58    | <b>6.57(0.45,12.70)</b>   | <b>0.04</b> | 4.46(-2.41,11.30)      | 0.20    |
| 2               | -1.27(-4.80,2.26)             | 0.48    | -1.31(-4.52,1.91)             | 0.42    | -1.95(-4.66,0.76)       | 0.16    | -0.95(-3.70,1.80)         | 0.50        | -2.06(-5.10,0.98)      | 0.18    |
| 3               | 3.16(-1.17,7.50)              | 0.15    | 0.46(-3.52,4.44)              | 0.82    | 1.27(-2.22,4.75)        | 0.47    | 1.79(-1.69,5.26)          | 0.31        | 1.49(-2.39,5.36)       | 0.45    |
| 4               | 2.72(-3.87,9.30)              | 0.42    | 1.71(-4.32,7.75)              | 0.58    | -1.45(-6.46,3.56)       | 0.57    | -0.97(-6.04,4.10)         | 0.71        | 0.25(-5.34,5.84)       | 0.93    |
| 5               | 0.16(-2.57,2.89)              | 0.91    | -0.66(-3.16,1.84)             | 0.60    | -0.91(-3.04,1.22)       | 0.40    | 0.37(-1.74,2.48)          | 0.73        | -0.72(-3.07,1.63)      | 0.55    |
| 6               | 2.09(-1.40,5.58)              | 0.24    | -0.01(-3.21,3.20)             | 1.00    | 1.00(-1.70,3.69)        | 0.47    | 1.70(-0.99,4.38)          | 0.21        | 1.19(-1.81,4.18)       | 0.44    |
| 7               | 3.20(-3.11,9.50)              | 0.93    | 1.78(-4.00,7.55)              | 0.29    | -1.03(-5.95,3.88)       | 0.24    | 0.19(-4.63,5.01)          | 0.64        | 1.51(-3.95,6.98)       | 0.21    |
| 8               | 5.05(-1.81,11.90)             | 0.32    | -4.08(-10.40,2.21)            | 0.54    | -1.14(-6.43,4.16)       | 0.68    | -0.25(-5.57,5.07)         | 0.94        | -0.41(-6.36,5.54)      | 0.59    |
| 9               | 2.14(-5.06,9.34)              | 0.15    | -4.43(-11.00,2.18)            | 0.20    | -2.13(-7.70,3.45)       | 0.67    | -0.46(-6.06,5.13)         | 0.93        | -2.52(-8.74,3.71)      | 0.89    |
| 11              | 1.80(-3.93,7.52)              | 0.56    | -4.25(-9.46,0.95)             | 0.19    | -2.28(-6.62,2.06)       | 0.45    | -1.28(-5.63,3.06)         | 0.87        | -1.90(-6.75,2.94)      | 0.43    |
| 13              | 1.57(-2.68,5.83)              | 0.54    | -2.01(-5.91,1.88)             | 0.11    | -0.97(-4.26,2.31)       | 0.30    | -0.79(-4.05,2.46)         | 0.56        | -0.70(-4.35,2.95)      | 0.44    |
| 14              | 2.05(-2.06,6.17)              | 0.47    | -3.51(-7.24,0.23)             | 0.31    | -1.40(-4.55,1.75)       | 0.56    | -0.56(-3.69,2.57)         | 0.63        | -1.19(-4.70,2.32)      | 0.71    |
| 15              | 2.55(-2.85,7.96)              | 0.33    | -3.22(-8.12,1.69)             | 0.07    | -1.42(-5.56,2.72)       | 0.38    | 0.27(-3.89,4.42)          | 0.73        | -0.87(-5.51,3.77)      | 0.50    |
| 16              | 2.38(-1.27,6.04)              | 0.35    | -1.75(-5.10,1.61)             | 0.20    | -1.44(-4.27,1.40)       | 0.50    | -0.15(-3.00,2.69)         | 0.90        | -0.34(-3.51,2.84)      | 0.71    |
| 17              | 1.04(-5.48,7.56)              | 0.20    | -2.62(-8.58,3.34)             | 0.31    | -3.53(-8.52,1.47)       | 0.32    | -2.27(-7.29,2.75)         | 0.92        | -2.07(-7.67,3.53)      | 0.84    |
| 19              | -4.61(-9.72,0.50)             | 0.75    | -1.28(-5.99,3.43)             | 0.39    | -0.26(-4.25,3.73)       | 0.17    | 0.11(-3.84,4.06)          | 0.37        | -2.92(-7.33,1.49)      | 0.47    |

All models adjusted for maternal education, maternal scores for verbal cognition, cell composition, batch, and *PON1*<sub>-108</sub> genotype.

Crude p-values <0.05 are bolded.

None of the associations remained significant after controlling for FDR.

\*Methylation in 7-year old blood samples were assessed by EPIC BeadChip. CpG sites 10 and 18 are not shown because they were not assessed by EPIC.

**Supplemental Table 12. Mediation analysis of OPs, PON1 DNA methylation, and child cognition**

|                          | Mediation Model 1: Mean (95%CI) | Mediation Model 2: Mean (95%CI) |
|--------------------------|---------------------------------|---------------------------------|
| Natural Indirect Effect  | -0.05(-0.41,0.31)               | -0.41(-1.77,2.0E-3)             |
| Controlled Direct Effect | -5.15(-10.07,-0.22)             | -2.27(-6.06,1.77)               |
| Total Effect             | -5.19(-10.13,-0.26)             | -2.68(-6.62,1.25)               |

Mediation model 1 assessed mediation by cord blood methylation of CpG site 19 of DEP exposure on verbal comprehension IQ at age 7 yr.

Mediation model 2 assessed mediation by 7-year old blood methylation of CpG site 1 of total DAP exposure on processing speed IQ at age 7 yr.

Both models adjusted for maternal education, maternal scores for verbal cognition, cell composition, and batch.

**Supplemental Table 13. Regression models of log 10 average pregnancy DAPs with cord blood DNA methylation**

| CpG Site Number | Total DAPs         |         | DMs               |         | DEs                       |             |
|-----------------|--------------------|---------|-------------------|---------|---------------------------|-------------|
|                 | $\beta$ (95%CI)    | p-value | $\beta$ (95%CI)   | p-value | $\beta$ (95%CI)           | p-value     |
| 1               | 0.00(-0.06,0.06)   | 0.94    | 0.02(-0.03,0.07)  | 0.46    | -0.04(-0.10,0.02)         | 0.18        |
| 2               | -0.04(-0.11,0.03)  | 0.22    | -0.03(-0.10,0.03) | 0.29    | -0.02(-0.09,0.05)         | 0.50        |
| 3               | -0.05(-0.11,0.02)  | 0.16    | -0.02(-0.08,0.04) | 0.51    | <b>-0.08(-0.14,-0.01)</b> | <b>0.02</b> |
| 7               | -0.06(-0.11,0.00)  | 0.06    | -0.03(-0.09,0.02) | 0.19    | <b>-0.07(-0.12,-0.01)</b> | <b>0.03</b> |
| 8               | -0.05(-0.14,0.04)  | 0.31    | -0.04(-0.12,0.04) | 0.36    | -0.03(-0.12,0.06)         | 0.54        |
| 9               | -0.05(-0.15,0.05)  | 0.31    | -0.04(-0.13,0.05) | 0.39    | -0.03(-0.13,0.06)         | 0.49        |
| 10              | -0.04(-0.16,0.07)  | 0.43    | -0.03(-0.13,0.07) | 0.55    | -0.03(-0.13,0.08)         | 0.66        |
| 11              | -0.11(-0.26,0.04)  | 0.16    | -0.12(-0.25,0.02) | 0.09    | 0.01(-0.14,0.15)          | 0.95        |
| 12              | -0.04(-0.11,0.02)  | 0.21    | -0.04(-0.10,0.02) | 0.17    | -0.01(-0.08,0.05)         | 0.68        |
| 13              | -0.10(-0.26,0.06)  | 0.21    | -0.10(-0.24,0.04) | 0.17    | -0.04(-0.19,0.12)         | 0.67        |
| 14              | -0.09(-0.25,0.06)  | 0.24    | -0.09(-0.22,0.05) | 0.22    | -0.04(-0.19,0.11)         | 0.58        |
| 15              | -0.05(-0.16,0.06)  | 0.40    | -0.05(-0.14,0.05) | 0.38    | -0.02(-0.13,0.09)         | 0.77        |
| 16              | -0.05(-0.15,0.05)  | 0.33    | -0.04(-0.13,0.05) | 0.37    | -0.04(-0.15,0.06)         | 0.39        |
| 17              | -0.032(-0.09,0.02) | 0.26    | -0.02(-0.07,0.03) | 0.33    | -0.02(-0.08,0.03)         | 0.44        |
| 18              | -0.02(-0.09,0.06)  | 0.68    | -0.01(-0.07,0.06) | 0.85    | -0.03(-0.11,0.04)         | 0.36        |
| 19              | -0.01(-0.08,0.07)  | 0.90    | 0.02(-0.05,0.08)  | 0.62    | -0.06(-0.13,0.01)         | 0.11        |

DAPs- dialkyl phosphates DMs-dimethyl phosphates DEs-diethyl phosphates

All models adjusted for cell composition and batch.

\*Methylation in cord blood samples were assessed by 450K BeadChip. CpG sites 4,5, and 6 are not shown because they were not assessed by 450K.

**Supplemental Table 14. Regression models of log 10 average pregnancy DAPs with 7-year old blood DNA methylation**

| CpG Site Number | Total DAPs        |         | DMs               |         | DEs               |         |
|-----------------|-------------------|---------|-------------------|---------|-------------------|---------|
|                 | $\beta$ (95%CI)   | p-value | $\beta$ (95%CI)   | p-value | $\beta$ (95%CI)   | p-value |
| 1               | -0.11(-0.22,0.01) | 0.07    | -0.07(-0.18,0.03) | 0.18    | -0.07(-0.17,0.04) | 0.24    |
| 2               | 0.18(-0.08,0.43)  | 0.18    | 0.15(-0.08,0.38)  | 0.19    | 0.09(-0.15,0.33)  | 0.48    |
| 3               | -0.10(-0.31,0.11) | 0.36    | -0.04(-0.22,0.15) | 0.69    | -0.14(-0.33,0.06) | 0.16    |
| 4               | -0.02(-0.16,0.11) | 0.75    | -0.03(-0.15,0.09) | 0.59    | 0.10(-0.02,0.22)  | 0.10    |
| 5               | -0.03(-0.36,0.30) | 0.86    | -0.02(-0.32,0.27) | 0.88    | 0.03(-0.27,0.33)  | 0.84    |
| 6               | 0.11(-0.14,0.35)  | 0.39    | 0.05(-0.17,0.27)  | 0.66    | 0.12(-0.10,0.35)  | 0.28    |
| 7               | 0.03(-0.11,0.18)  | 0.64    | 0.04(-0.09,0.17)  | 0.52    | 0.01(-0.13,0.14)  | 0.89    |
| 8               | 0.05(-0.15,0.25)  | 0.63    | 0.02(-0.16,0.20)  | 0.82    | 0.03(-0.15,0.22)  | 0.72    |
| 9               | -0.01(-0.20,0.18) | 0.89    | -0.04(-0.20,0.13) | 0.68    | -0.00(-0.18,0.17) | 0.96    |
| 11              | 0.07(-0.18,0.32)  | 0.59    | 0.04(-0.18,0.26)  | 0.73    | 0.01(-0.22,0.24)  | 0.95    |
| 13              | 0.09(-0.24,0.43)  | 0.58    | 0.04(-0.27,0.34)  | 0.82    | 0.08(-0.24,0.39)  | 0.63    |
| 14              | 0.11(-0.23,0.46)  | 0.51    | 0.05(-0.25,0.36)  | 0.74    | 0.09(-0.23,0.40)  | 0.59    |
| 15              | 0.05(-0.22,0.31)  | 0.72    | 0.02(-0.22,0.25)  | 0.90    | 0.02(-0.22,0.26)  | 0.87    |
| 16              | 0.14(-0.23,0.51)  | 0.46    | 0.06(-0.27,0.40)  | 0.71    | 0.16(-0.19,0.50)  | 0.37    |
| 17              | -0.04(-0.17,0.10) | 0.62    | -0.05(-0.18,0.07) | 0.41    | -0.00(-0.13,0.12) | 0.95    |
| 19              | 0.04(-0.14,0.21)  | 0.69    | 0.11(-0.05,0.27)  | 0.18    | -0.12(-0.28,0.05) | 0.16    |

DAPs- dialkyl phosphates DMs-dimethyl phosphates DEs-diethyl phosphates

All models adjusted for cell composition and batch.

\*Methylation in 7-year old blood samples were assessed by EPIC BeadChip. CpG sites 10 and 18 are not shown because they were not assessed by EPIC.
